# Supplementary material for: Analyzing COVID‐19 Using Multisource Data: An Integrated Approach of Visualization, Spatial Regression, and Machine Learning
Source: PubMed Central journal article supplement (PMC8335962; doi:10.1029/2021gh000439), 2021-08-01
Supplement: GH2-5-e2021GH000439-s001.pdf [file GH2-5-e2021GH000439-s001.pdf]

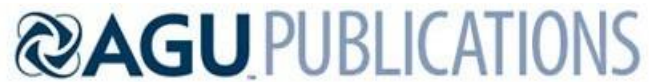

*GeoHealth*

Supporting Information for

**Analyzing COVID-19 Using Multisource Data: An Integrated Approach of Visualization, Spatial Regression and Machine Learning**

Chao Wu<sup>1,2</sup>, Mengjie Zhou<sup>3,4</sup>, Pengyu Liu<sup>1</sup>, and Mengjie Yang<sup>3</sup>

<sup>1</sup> School of Geographic and Biologic Information, Nanjing University of Posts and Telecommunications, Nanjing 210023, China, <sup>2</sup> Smart Health Big Data Analysis and Location Services Engineering Lab of Jiangsu Province, Nanjing University of Posts and Telecommunications, Nanjing 210023, China, <sup>3</sup> College of Resources and Environmental Science, Hunan Normal University, Changsha 410081, China, <sup>4</sup> Key Laboratory of Geospatial Big Data Mining and Application, Hunan Province, Changsha 410000, China.

**Contents of this file**

Figure S1

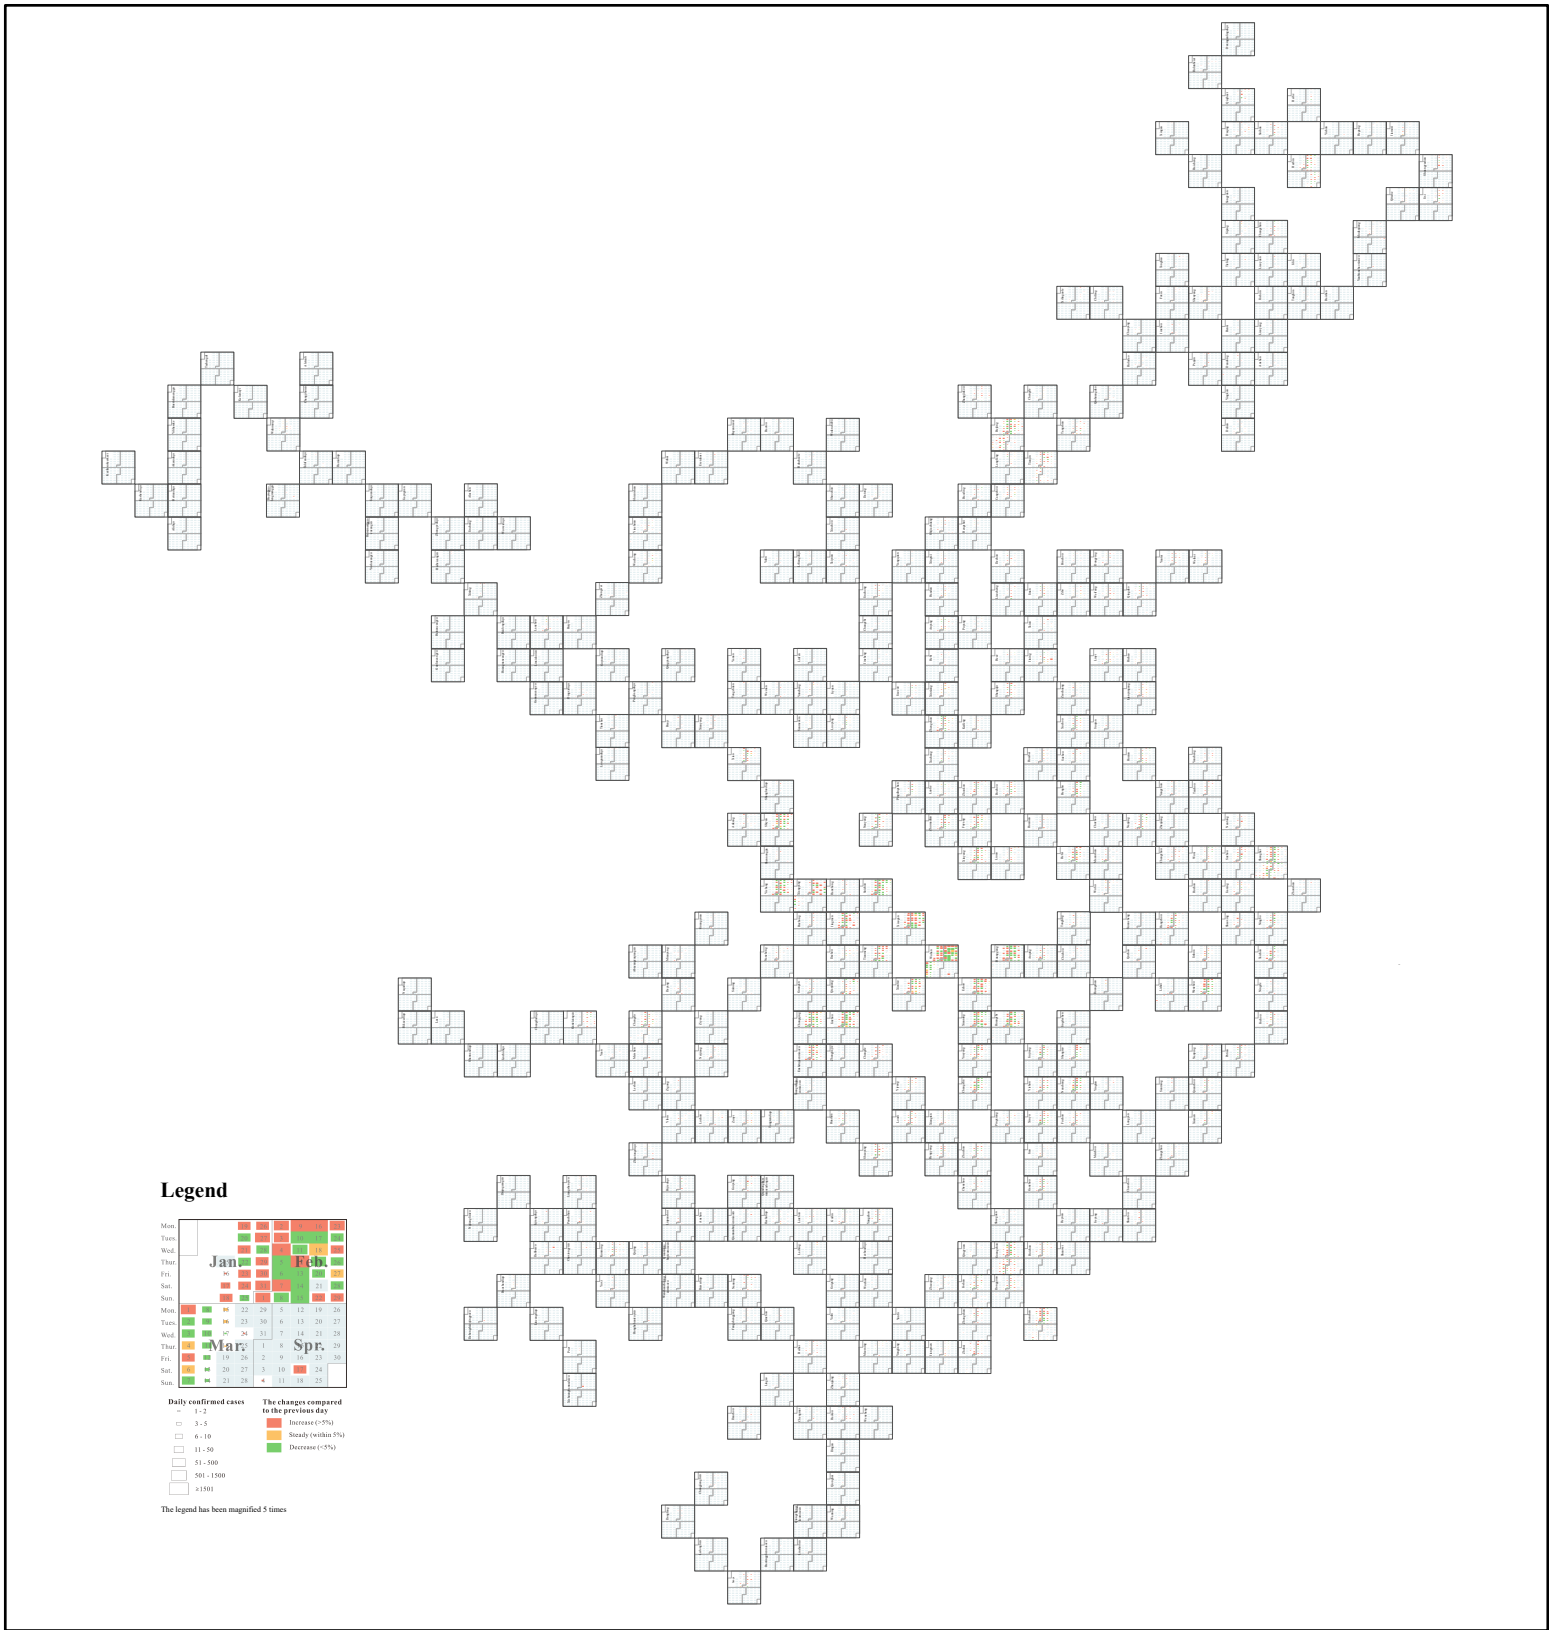

**Figure S1.** The spatial-temporal visualization of daily confirmed cases of COVID-19.
